# Supplementary material
Source: Springer Nature journal article supplement (https://www.springermedizin.de/resource/supplementary/12936_2008_763_MOESM3_ESM.pdf/9548468)
Supplement: MOESM3 [file 9548468]

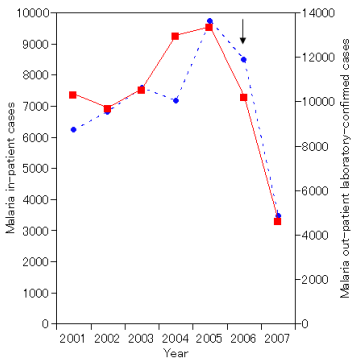

■ Malaria out-patient laboratory-confirmed cases  
● Malaria in-patient cases

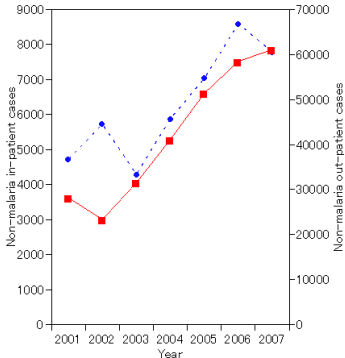

■ Non-malaria out-patient cases  
● Non-malaria in-patient cases
